# Supplementary material
Source: ML conference proceedings conference paper supplement (https://aclanthology.org/2022.eval4nlp-1.8)
Supplement: SupplementaryMaterial [file 2022.eval4nlp-1.8.SupplementaryMaterial.zip]

Archive with 15 entries (10 files):
- SupplementalMaterials/
- SupplementalMaterials/.DS_Store
- SupplementalMaterials/SupMat_Appendix.pdf
- SupplementalMaterials/results/
- SupplementalMaterials/results/.DS_Store
- SupplementalMaterials/results/sentence_length/
- SupplementalMaterials/results/sentence_length/all_wmt17_result_pearson.tsv
- SupplementalMaterials/results/sentence_length/all_marco_result_addNLPsup.tsv
- SupplementalMaterials/results/all_result_addNLIsup_MT.tsv
- SupplementalMaterials/results/similarity/
- SupplementalMaterials/results/similarity/stspearson_vs_mtm_pearson.tsv
- SupplementalMaterials/results/vocab/
- SupplementalMaterials/results/vocab/all_wmt17_result_pearson_addNLPsup.tsv
- SupplementalMaterials/results/vocab/all_marco_result_addNLPsup.tsv
- SupplementalMaterials/results/all_result_addNLIsup_PR.tsv
