# Supplementary material
Source: ML conference proceedings conference paper supplement (https://aclanthology.org/2022.eval4nlp-1.8)
Supplement: SupplementaryMaterial [file 2022.eval4nlp-1.8.SupplementaryMaterial.zip › SupplementalMaterials/results/all_result_addNLIsup_MT.tsv]

	STS-b-pearson	STS-b-spearman	WMT17-pearson	WMT17-kendall
SimCSE-sup	0.8420443499	0.8457813599	0.6501862956	0.4807045154
SBERT-bb-NLI-mean	0.769390875	0.7851594489	0.5809474474	0.4284674495
SBERT-MiniLM	0.8440177523	0.8325741283	0.6021659174	0.4283501472
SBERT-mpnet	0.8597149122	0.852405689	0.6553458365	0.4792430219
SimCSE-unsup	0.7995601851	0.7900600999	0.6448473665	0.4660035411
BERTScore-rl-p	0.5285553146	0.5240758014	0.7225615084	0.5316406198
BERTScore-rl-r	0.5252866839	0.5229100525	0.7269727784	0.5449603528
BERTScore-rl-f	0.5508486237	0.5464108144	0.7555442884	0.5636428707
BERTScore-bbu-p	0.5330632222	0.5218006341	0.6873389835	0.4916276686
BERTScore-bbu-r	0.5317948933	0.5191233518	0.6869961719	0.4921309104
BERTScore-bbu-f	0.5496273041	0.5389832019	0.7046536148	0.5081570328
avg. of BERT-bbu	0.6386020372	0.6342932589	0.5272580694	0.3641069203
avg. of BERT-rl	0.5687243666	0.5761060793	0.4407274768	0.3215359762
USE	0.7897344906	0.7764975012	0.5802132832	0.3971483844
USE-l	0.8171823429	0.8039712464	0.6198246238	0.4276643796
BoV-Word2Vec (mean)	0.5094280178	0.5067618699	0.4151229528	0.293464707
BoV-Word2Vec (max)	0.4838734424	0.5009102926	0.3195357537	0.2649816305
BoV-Glove (mean)	0.3631499263	0.4278106949	0.3226213364	0.2613865272
BoV-Glove (max)	0.5077081761	0.5269314973	0.3071615768	0.2719975598
BoV-fasttext (mean)	0.4718554439	0.4850592013	0.373310336	0.2748125693
BoV-fasttext (max)	0.5031948662	0.5187301919	0.3187389063	0.2616021852
BoW (sum)	0.6974039381	0.6826990303	0.4678374121	0.3166366056
BoW-TFIDF (sum)	0.6958764995	0.6808583911	0.4666176456	0.3157043482
