# Supplementary material
Source: ML conference proceedings conference paper supplement (https://aclanthology.org/2022.eval4nlp-1.8)
Supplement: SupplementaryMaterial [file 2022.eval4nlp-1.8.SupplementaryMaterial.zip › SupplementalMaterials/results/all_result_addNLIsup_PR.tsv]

	STS-b-pearson	STS-b-spearman	MS-MARCO
SimCSE-sup	0.8420443499	0.8457813599	0.1353740683
SBERT-bb-NLI-mean	0.769390875	0.7851594489	0.05067139012
SBERT-MiniLM	0.8440177523	0.8325741283	0.3332742586
SBERT-mpnet	0.8597149122	0.852405689	0.3639518218
SimCSE-unsup	0.7995601851	0.7900600999	0.1295590014
BERTScore-rl-p	0.5285553146	0.5240758014	0.1014927441
BERTScore-rl-r	0.5252866839	0.5229100525	0.02575532179
BERTScore-rl-f	0.5508486237	0.5464108144	0.06736689841
BERTScore-bbu-p	0.5330632222	0.5218006341	0.1265515658
BERTScore-bbu-r	0.5317948933	0.5191233518	0.04257075054
BERTScore-bbu-f	0.5496273041	0.5389832019	0.08257345761
avg. of BERT-bbu	0.6386020372	0.6342932589	0.09423597513
avg. of BERT-rl	0.5687243666	0.5761060793	0.06512205828
USE	0.7897344906	0.7764975012	0.1140056469
USE-l	0.8171823429	0.8039712464	0.2109886607
BoV-Glove (mean)	0.3631499263	0.4278106949	0.04429821232
BoV-Glove (max)	0.5077081761	0.5269314973	0.02132376753
BoV-fasttext (mean)	0.4718554439	0.4850592013	0.05314721628
BoV-fasttext (max)	0.5031948662	0.5187301919	0.03955376434
BoW (sum)	0.6974039381	0.6826990303	0.1025151039
BoW-TFIDF (sum)	0.6958764995	0.6808583911	0.1041416832
