# Supplementary material
Source: ML conference proceedings conference paper supplement (https://aclanthology.org/2022.eval4nlp-1.8)
Supplement: SupplementaryMaterial [file 2022.eval4nlp-1.8.SupplementaryMaterial.zip › SupplementalMaterials/results/sentence_length/all_marco_result_addNLPsup.tsv]

	STS	STS-ρ	all	PR-[10, 50)	PR-[15, 55)	PR-[20, 60)	PR-[25, 65)	PR-[30, 70)	PR-[35, 75)	PR-[40, 80)
SimCSE-sup	0.8420443499	0.8457813599	0.1353740683	0.4442442549	0.3596458583	0.2935902678	0.2319729189	0.1843929077	0.1731460093	0.1233391804
SBERT-bb-NLI-mean	0.769390875	0.7851594489	0.05067139012	0.313493248	0.2712811791	0.1554224788	0.1146719375	0.076163068	0.06672924082	0.04128058952
SBERT-MiniLM	0.8440177523	0.8325741283	0.3332742586	0.6123797678	0.5357189542	0.4538973064	0.4125133285	0.4024295109	0.3738916218	0.3112977007
SBERT-mpnet	0.8597149122	0.852405689	0.3639518218	0.626817105	0.5101440576	0.471485089	0.4203386647	0.4064518795	0.4013538296	0.3484191474
SimCSE-unsup	0.7995601851	0.7900600999	0.1295590014	0.3841494906	0.3041956783	0.2433453583	0.2210002423	0.1642787686	0.1461549216	0.1323552426
BERTScore-rl-p	0.5285553146	0.5240758014	0.1014927441	0.342981521	0.2215866347	0.181542809	0.1526650915	0.1493338151	0.1337732204	0.09943335225
BERTScore-rl-r	0.5252866839	0.5229100525	0.02575532179	0.3455816157	0.1678384687	0.1204072471	0.0802420332	0.05258621125	0.03535254804	0.01797150424
BERTScore-rl-f	0.5508486237	0.5464108144	0.06736689841	0.4541056622	0.2483740163	0.21001443	0.148414213	0.124575798	0.09858299744	0.06108058608
BERTScore-bbu-p	0.5330632222	0.5218006341	0.1265515658	0.3408919687	0.2858410031	0.2612662338	0.1907082273	0.1637463829	0.1550370579	0.1210347555
BERTScore-bbu-r	0.5317948933	0.5191233518	0.04257075054	0.405920398	0.2467073496	0.198124499	0.1266215316	0.07970587781	0.06698622841	0.02786935287
BERTScore-bbu-f	0.5496273041	0.5389832019	0.08257345761	0.4632409382	0.3248619448	0.271974507	0.1866863565	0.1368478765	0.1172344061	0.06744054068
avg. of BERT-bbu	0.6386020372	0.6342932589	0.09423597513	0.4500319829	0.3122555689	0.2567857143	0.1948621713	0.1585817716	0.1374597254	0.08388106416
avg. of BERT-rl	0.5687243666	0.5761060793	0.06512205828	0.4583285951	0.3025383487	0.2595759179	0.1838840422	0.1179565915	0.1107106888	0.06072804347
USE	0.7897344906	0.7764975012	0.1140056469	0.3409286899	0.2198919568	0.1903411095	0.1426599418	0.1227176605	0.1297290633	0.1034738345
USE-l	0.8171823429	0.8039712464	0.2109886607	0.4540144516	0.377955849	0.3102200577	0.249764934	0.2198064125	0.2169414766	0.1919947033
BoV-Glove (mean)	0.3631499263	0.4278106949	0.04429821232	0.1096304193	0.06838201947	0.04862313612	0.0464597722	0.05044286528	0.05580240477	0.04075994428
BoV-Glove (max)	0.5077081761	0.5269314973	0.02132376753	0.1525408671	0.1037741763	0.05809323393	0.04369714043	0.04090708253	0.04141462656	0.02228628179
BoV-fasttext (mean)	0.4718554439	0.4850592013	0.05314721628	0.1060696517	0.06548285981	0.05645101812	0.05566490973	0.06600817271	0.07125075191	0.04000412733
BoV-fasttext (max)	0.5031948662	0.5187301919	0.03955376434	0.1822103767	0.1857923169	0.1055908289	0.08308796801	0.0726012026	0.05712867106	0.03214070749
BoW (sum)	0.6974039381	0.6826990303	0.1025151039	0.2620777067	0.1887288249	0.1399727433	0.1172001091	0.1155676018	0.1125772899	0.09037945622
BoW-TFIDF (sum)	0.6958764995	0.6808583911	0.1041416832	0.2640298507	0.1873422702	0.1507174924	0.1224890949	0.1166357164	0.1133062135	0.09156305353
