# Supplementary material
Source: ML conference proceedings conference paper supplement (https://aclanthology.org/2022.eval4nlp-1.8)
Supplement: SupplementaryMaterial [file 2022.eval4nlp-1.8.SupplementaryMaterial.zip › SupplementalMaterials/results/sentence_length/all_wmt17_result_pearson.tsv]

	STS-b-pearson	STS-b-spearman	all	word_subset_0_to_40	word_subset_5_to_45	word_subset_10_to_50	word_subset_15_to_55	word_subset_20_to_60	word_subset_25_to_65	word_subset_30_to_70
SimCSE-unsup	0.7995601851	0.7900600999	0.6448473665	0.6323473657	0.6301133053	0.6656403965	0.6687900631	0.6670736368	0.6532903869	0.6654459417
BERTScore-rl-p	0.5285553146	0.5240758014	0.7225615084	0.6838490733	0.6841980977	0.7144795561	0.7371507255	0.746191238	0.7484714166	0.7579916636
BERTScore-rl-r	0.5252866839	0.5229100525	0.7269727784	0.6783213546	0.6803223893	0.7284735589	0.7520101655	0.7637314631	0.7606224362	0.7415011773
BERTScore-rl-f	0.5508486237	0.5464108144	0.7555442884	0.7159499766	0.7168760303	0.750711987	0.7745229229	0.7833327084	0.7843329989	0.7778642832
BERTScore-bbu-p	0.5330632222	0.5218006341	0.6873389835	0.675450114	0.6746490734	0.6811609613	0.7027406612	0.7032677975	0.6899190444	0.7122771696
BERTScore-bbu-r	0.5317948933	0.5191233518	0.6869961719	0.6638407136	0.6637637314	0.6866470221	0.7024907617	0.7124133416	0.7027711214	0.7024148946
BERTScore-bbu-f	0.5496273041	0.5389832019	0.7046536148	0.6844907263	0.6842255846	0.7015243572	0.7216426173	0.7267815455	0.7145686848	0.7261333624
avg. of BERT-bbu	0.6386020372	0.6342932589	0.5272580694	0.5763741883	0.5754689137	0.5694796044	0.5742554074	0.605314327	0.6098904168	0.6069393759
avg. of BERT-rl	0.5687243666	0.5761060793	0.4407274768	0.4895614615	0.4867032937	0.5091307821	0.5195595995	0.5547557318	0.5735145259	0.5589511103
BoV-Word2Vec (mean)	0.5094280178	0.5067618699	0.4151229528	0.4978412522	0.4947469890	0.4598750626	0.4776780962	0.5148750379	0.5222796899	0.4784074825
BoV-Word2Vec (max)	0.4838734424	0.5009102926	0.3195357537	0.4037801299	0.4079791458	0.4437875297	0.4894010327	0.5450503853	0.5546150843	0.5381418393
BoV-Glove (mean)	0.3631499263	0.4278106949	0.3226213364	0.3721396215	0.3747222546	0.3581917969	0.3753792028	0.4219888173	0.443095062	0.4172146561
BoV-Glove (max)	0.5077081761	0.5269314973	0.3071615768	0.3749947333	0.3857987615	0.4278066522	0.4615899044	0.4920320291	0.5031106653	0.5509145982
BoV-fasttext (mean)	0.4718554439	0.4850592013	0.373310336	0.4292430847	0.4309303898	0.4108721261	0.4388553467	0.4727898766	0.4834985908	0.4736421346
BoV-fasttext (max)	0.5031948662	0.5187301919	0.3187389063	0.3834712436	0.3947511235	0.429909422	0.4597706454	0.5143569445	0.5287088429	0.5218370164
BoW (sum)	0.6974039381	0.6826990303	0.4678374121	0.4179334383	0.4152747731	0.4574936856	0.4967760712	0.4980476233	0.4805674238	0.4764497092
BoW-TFIDF (sum)	0.6958764995	0.6808583911	0.4666176456	0.4150374177	0.4125008307	0.4561962797	0.4960239707	0.4989849453	0.4822754939	0.4776314362
