# Supplementary material
Source: ML conference proceedings conference paper supplement (https://aclanthology.org/2022.eval4nlp-1.8)
Supplement: SupplementaryMaterial [file 2022.eval4nlp-1.8.SupplementaryMaterial.zip › SupplementalMaterials/results/similarity/stspearson_vs_mtm_pearson.tsv]

	STS-[0, 1]	STS-(1,2]	STS-(2,3]	STS-(3,4]	STS-(4,5]	MTM-Sim-Low	MTM-Sim-MidLow	MTM-Sim-MidHigh	MTM-Sim-High
SimCSE-sup	0.559568001	0.2844361109	0.2404345972	0.2490235157	0.363835284	0.4040090001	0.175434126	0.1880272542	0.2987839871
SBERT-bb-NLI-mean	0.4233847828	0.2280836515	0.2427544574	0.2140603525	0.3826836234	0.3931637596	0.1254812869	0.1129331311	0.2419122867
SBERT-MiniLM	0.621934147	0.2527199505	0.1696373203	0.2111891867	0.3079195063	0.3185880153	0.1473502813	0.1299609162	0.2972319267
SBERT-mpnet	0.5933094941	0.2360649461	0.1975948897	0.2084871411	0.2935721654	0.3536464168	0.2032071562	0.1745411815	0.3018838011
USE	0.5617626973	0.1630228604	0.1163535482	0.2226532079	0.3485318793	0.3215982984	0.1154169683	0.1341330434	0.3341726624
USE-l	0.5773490179	0.2018984411	0.1541221415	0.2383449817	0.407022056	0.3562075669	0.1380465255	0.144298464	0.3396335269
SimCSE-unsup	0.5241646979	0.1842408812	0.1141211045	0.2367399619	0.2953085635	0.3972168451	0.1374987149	0.1781515185	0.3032522677
BERTScore-rl-p	0.1651650535	0.03655347751	0.03712201603	0.1696689485	0.2664344439	0.3181965339	0.1715016822	0.2592187651	0.4478936365
BERTScore-rl-r	0.1813676736	0.03349517586	0.001036760526	0.1540734568	0.2835862789	0.3513346122	0.2100805556	0.2904371542	0.4332620941
BERTScore-rl-f	0.1799877755	0.03632698688	0.0193066187	0.1790869866	0.297849748	0.3726507003	0.2095005163	0.2947589089	0.461379263
BERTScore-bbu-p	0.2221202822	0.02014331859	0.05162142662	0.1402533956	0.2308131646	0.3869711579	0.1596510241	0.181368213	0.4102686426
BERTScore-bbu-r	0.2322246165	0.0115610644	0.03566583007	0.1408531103	0.2522295046	0.3909126126	0.1605962762	0.2223329386	0.3856662918
BERTScore-bbu-f	0.231923899	0.0124977925	0.04148556116	0.152162127	0.2608320381	0.4050191431	0.1688028039	0.2105961795	0.4166232064
avg. of BERT-bbu	0.3407773068	0.1306451292	0.1116749185	0.1463321778	0.295568632	0.3962626633	0.07756137293	0.1018494818	0.2413308342
avg. of BERT-rl	0.2658716423	0.1422191813	0.1504918649	0.08017275536	0.1799524392	0.3705807563	0.05844202099	0.08783073238	0.2008626271
BoV-Word2Vec (mean)	0.2372992234	0.1316761961	0.1250673003	0.1249961011	0.1450857462	0.3065926691	0.0572767345	0.03487548563	0.1643690716
BoV-Word2Vec (max)	0.2402348235	0.1036508328	0.1040987464	0.05060548709	0.04777827647	0.2671748034	0.05286712403	0.02972232728	0.1401681513
BoV-Glove (mean)	0.1479044843	0.09190576005	0.1262829942	0.09633142977	0.05490631422	0.2675867549	0.03637304319	0.05356450952	0.07955645824
BoV-Glove (max)	0.2325920416	0.09361673862	0.08849410672	0.06667197785	0.02493477676	0.2504723615	0.04774998778	0.052387348	0.1370070254
BoV-fasttext (mean)	0.2100645861	0.0886058598	0.1068367244	0.1132802755	0.124553968	0.3155255154	0.04811554996	0.04530536834	0.108243369
BoV-fasttext (max)	0.2442326181	0.0839889461	0.09106414669	0.05989966416	0.07982421323	0.2793249236	0.05564383142	0.05107199048	0.1191739449
BoW (sum)	0.4517565708	0.1642791016	0.1290995647	0.1182325931	0.1974826652	0.2348752737	0.07182864153	0.1135369751	0.3172039492
BoW-TFIDF (sum)	0.4551673599	0.1618982398	0.128208082	0.1139279911	0.1971136356	0.2318215567	0.07052933247	0.1149699969	0.3158580508
