# Supplementary material
Source: ML conference proceedings conference paper supplement (https://aclanthology.org/2022.eval4nlp-1.8)
Supplement: SupplementaryMaterial [file 2022.eval4nlp-1.8.SupplementaryMaterial.zip › SupplementalMaterials/results/vocab/all_marco_result_addNLPsup.tsv]

	STS	STS-Spearman	all	PR-Recall(s,s')-High	PR-Recall(s,s')-Low
SimCSE-sup	0.8420443499	0.8457813599	0.1353740683	0.1527063492	0.2013582065
SBERT-bb-NLI-mean	0.769390875	0.7851594489	0.05067139012	0.07161904762	0.1435239732
SBERT-MiniLM	0.8440177523	0.8325741283	0.3332742586	0.2726071429	0.4270864016
SBERT-mpnet	0.8597149122	0.852405689	0.3639518218	0.344468254	0.4211135657
SimCSE-unsup	0.7995601851	0.7900600999	0.1295590014	0.1308849206	0.1322696776
BERTScore-rl-p	0.5285553146	0.5240758014	0.1014927441	0.1216785714	0.1760841106
BERTScore-rl-r	0.5252866839	0.5229100525	0.02575532179	0.05676190476	0.02117083947
BERTScore-rl-f	0.5508486237	0.5464108144	0.06736689841	0.1153452381	0.06292341679
BERTScore-bbu-p	0.5330632222	0.5218006341	0.1265515658	0.09380555556	0.2439698904
BERTScore-bbu-r	0.5317948933	0.5191233518	0.04257075054	0.06288492063	0.08145557192
BERTScore-bbu-f	0.5496273041	0.5389832019	0.08257345761	0.1168611111	0.1496072656
avg. of BERT-bbu	0.6386020372	0.6342932589	0.09423597513	0.1180952381	0.1192685322
avg. of BERT-rl	0.5687243666	0.5761060793	0.06512205828	0.1027896825	0.1040664376
USE	0.7897344906	0.7764975012	0.1140056469	0.1356071429	0.1089756177
USE-l	0.8171823429	0.8039712464	0.2109886607	0.177468254	0.2289068892
BoV-Glove (mean)	0.3631499263	0.4278106949	0.04429821232	0.02420634921	0.07779005073
BoV-Glove (max)	0.5077081761	0.5269314973	0.02132376753	0.04019444444	0.02225085911
BoV-fasttext (mean)	0.4718554439	0.4850592013	0.05314721628	0.0288452381	0.07887825233
BoV-fasttext (max)	0.5031948662	0.5187301919	0.03955376434	0.06176190476	0.09803632793
BoW (sum)	0.6974039381	0.6826990303	0.1025151039	0.07182936508	0.08730567829
BoW-TFIDF (sum)	0.6958764995	0.6808583911	0.1041416832	0.0676468254	0.09509491082
