# Supplementary material
Source: ML conference proceedings conference paper supplement (https://aclanthology.org/2022.eval4nlp-1.8)
Supplement: SupplementaryMaterial [file 2022.eval4nlp-1.8.SupplementaryMaterial.zip › SupplementalMaterials/results/vocab/all_wmt17_result_pearson_addNLPsup.tsv]

	STS	STS-Spearman	all	MTM-Recall(s,s')-High	MTM-Recall(s,s')-Low
SimCSE-sup	0.8420443499	0.8457813599	0.6501862956	0.6069097615	0.5470944862
SBERT-bb-NLI-mean	0.769390875	0.7851594489	0.5809474474	0.5392951339	0.5727809539
SBERT-MiniLM	0.8440177523	0.8325741283	0.6021659174	0.4839194875	0.5086469928
SBERT-mpnet	0.8597149122	0.852405689	0.6553458365	0.6005052714	0.5590664869
SimCSE-unsup	0.7995601851	0.7900600999	0.6448473665	0.5932220972	0.471930866
BERTScore-rl-p	0.5285553146	0.5240758014	0.7225615084	0.6534275323	0.713001042
BERTScore-rl-r	0.5252866839	0.5229100525	0.7269727784	0.6946216317	0.7342808812
BERTScore-rl-f	0.5508486237	0.5464108144	0.7555442884	0.6912507356	0.7705857561
BERTScore-bbu-p	0.5330632222	0.5218006341	0.6873389835	0.6589738381	0.637468687
BERTScore-bbu-r	0.5317948933	0.5191233518	0.6869961719	0.6875419166	0.663243089
BERTScore-bbu-f	0.5496273041	0.5389832019	0.7046536148	0.692455191	0.6683633208
avg. of BERT-bbu	0.6386020372	0.6342932589	0.5272580694	0.4329374868	0.50841346
avg. of BERT-rl	0.5687243666	0.5761060793	0.4407274768	0.3218703525	0.4572939741
USE	0.7897344906	0.7764975012	0.5802132832	0.5085475008	0.5286033734
USE-l	0.8171823429	0.8039712464	0.6198246238	0.5222429718	0.5158022768
BoV-Word2Vec (mean)	0.5094280178	0.5067618699	0.4151229528	0.005645575169	0.4933974022
BoV-Word2Vec (max)	0.4838734424	0.5009102926	0.3195357537	-0.03484250566	0.4380573763
BoV-Glove (mean)	0.3631499263	0.4278106949	0.3226213364	-0.0770721634	0.4290711319
BoV-Glove (max)	0.5077081761	0.5269314973	0.3071615768	0.2919103162	0.4136525799
BoV-fasttext (mean)	0.4718554439	0.4850592013	0.373310336	-0.01775412609	0.4389502815
BoV-fasttext (max)	0.5031948662	0.5187301919	0.3187389063	0.01239285068	0.4720766952
BoW (sum)	0.6974039381	0.6826990303	0.4678374121	-0.1827821797	0.4088686467
BoW-TFIDF (sum)	0.6958764995	0.6808583911	0.4666176456	-0.1818876302	0.410139095
